# Supplementary material
Source: publisher site journal article supplement (https://www.dovepress.com/article/585980)
Supplement: Supplementary file 1 [file 585980%20Revised%20Supplementary%20Tables.docx]

**Supplementary Table S1. Complete list of candidate variables with univariate *P* < 0.10**

| **Variable** | **Univariate OR (95% CIs)** | ***P*-value** |
| --- | --- | --- |
| GCS score | 0.770 (0.670–0.884) | <0.01 |
| RBC, ×10¹²/L | 0.575 (0.336–0.982) | 0.043 |
| ApoA1,g/L | 0.350 (0.180–0.680) | <0.01 |
| NHHR | 0.692 (0.519–0.922) | 0.002 |
| RC, mmol/L | 0.268 (0.083–0.871) | 0.038 |

**Notes:** Data are presented as univariate odds ratios (OR) with 95% confidence intervals (CIs) and corresponding *P*-values from univariate logistic regression analysis. All variables listed had a *P*-value < 0.10 and were considered candidate predictors for inclusion in the initial multivariable model, alongside the pre-specified clinical covariates (age, sex, admission NIHSS score, hematoma volume, and intraventricular extension). The final multivariable model was derived by applying backward stepwise elimination (removal criterion*P*≥ 0.10) to these candidate variables while forcing the pre-specified covariates into the model.

**Abbreviations:** ApoA1, apolipoprotein A1; CI, confidence interval; GCS, Glasgow Coma Scale; NHHR, non-high-density lipoprotein cholesterol to high-density lipoprotein cholesterol ratio; OR, odds ratio; RBC, red blood cell count; RC, remnant cholesterol.

**Supplementary Table S2. Comprehensive diagnostic accuracy metrics for variables predicting poor 90-day functional outcome in patients with ICH**

| **Predictor** | **AUC**  **(95% CIs)** | **Optimal Cut-off**  **(95% CIs)** | **Sensitivity, %**  **(95% CIs)** | **Specificity, %**  **(95% CIs)** | **PPV, %**  **(95% CIs)** | **NPV, %**  **(95% CIs)** | **Youden‘s Index** | ***P*-value** |
| --- | --- | --- | --- | --- | --- | --- | --- | --- |
| **Univariate analysis** | | | | | | | | |
| NHHR | 0.590 (0.510-0.670) | ≤3.185 (2.843–3.527) | 0.85 (0.76-0.94) | 0.40 (0.30-0.50) | 45.9 (37.1–53.5) | 81.2 (70.9–89.0) | 0.247 | 0.032 |
| RC | 0.639 (0.559-0.719) | ≤0.465 (0.425–0.505) | 0.48 (0.37-0.59) | 0.77 (0.70-0.84) | 54.9 (43.1–66.3) | 72.2 (64.2–79.2) | 0.254 | 0.001 |
| Glu | 0.606 (0.516-0.696) | >7.05 (6.80–7.30) | 0.67 (0.53-0.79) | 0.52 (0.41-0.62) | 47.5 (36.0–59.3) | 71.1 (59.5–80.8) | 0.191 | 0.044 |
| Hcy | 0.523 (0.433-0.613) | >15.58 (14.65–16.50) | 0.55 (0.41-0.69) | 0.50 (0.40-0.61) | 41.9 (30.6–54.1) | 63.0 (51.8–73.1) | 0.050 | 0.011 |
| Cys-C | 0.685 (0.599-0.771) | >1.000 (0.935–1.065) | 0.71 (0.57-0.82) | 0.65 (0.55-0.74) | 55.9 (43.8–67.4) | 78.0 (67.9–85.9) | 0.360 | <0.001 |
| Age | 0.678 (0.588-0.768) | >70.0 (67.5–72.5) | 0.69 (0.55-0.81) | 0.64 (0.54-0.74) | 53.8 (41.6–65.6) | 77.5 (67.0–85.7) | 0.330 | <0.001 |
| NIHSS score | 0.845 (0.773-0.917) | >5.0 (4.0–6.0) | 0.82 (0.69-0.91) | 0.78 (0.68-0.86) | 67.6 (54.5–78.8) | 88.7 (80.5–93.9) | 0.600 | <0.001 |
| Hematoma volume | 0.664 (0.573-0.755) | >11.0 (9.0–13.0) | 0.68 (0.54-0.80) | 0.63 (0.53-0.73) | 51.5 (39.3–63.5) | 77.3 (67.0–85.4) | 0.310 | <0.001 |
| **Bivariate combinations** | | | | | | | | |
| NHHR + age | 0.710 (0.624-0.796) | >0.410 (0.385–0.435) | 0.75 (0.61-0.86) | 0.71 (0.61-0.80) | 61.2 (48.4–73.0) | 82.5 (73.0–89.6) | 0.460 | <0.001 |
| NHHR + NIHSS score | 0.863 (0.798-0.928) | >0.187 (0.168–0.206) | 0.88 (0.76-0.95) | 0.83 (0.74-0.90) | 75.9 (63.5–85.8) | 92.0 (84.6–96.5) | 0.710 | <0.001 |
| NHHR + Glu | 0.622 (0.527-0.717) | >0.342 (0.320–0.364) | 0.73 (0.59-0.85) | 0.58 (0.47-0.68) | 52.5 (40.4–64.4) | 77.2 (66.4–85.7) | 0.310 | 0.016 |
| NHHR + Hcy | 0.710 (0.623-0.797) | >0.390 (0.365–0.415) | 0.74 (0.60-0.85) | 0.60 (0.49-0.70) | 53.5 (41.7–65.0) | 78.7 (68.6–86.6) | 0.340 | <0.001 |
| NHHR + Cys-C | 0.684 (0.593-0.775) | >0.415 (0.389–0.441) | 0.76 (0.62-0.87) | 0.62 (0.51-0.72) | 55.8 (43.8–67.2) | 80.5 (70.3–88.3) | 0.380 | <0.001 |

**Notes:** Data are presented as area under the receiver operating characteristic curve (AUC) with 95% confidence intervals (CIs), optimal cut-off values with 95% CIs, sensitivity, specificity, positive predictive value (PPV), negative predictive value (NPV), Youden's index, and corresponding P-values. AUC and its 95% CIs were calculated using the DeLong method. Sensitivity, specificity, PPV, NPV, and their 95% CIs were calculated using the exact binomial method (Wilson score interval). Optimal cut-off values were determined by maximizing Youden's index (sensitivity + specificity – 1); their 95% CIs were estimated using bootstrap resampling (1000 iterations). For cut-off descriptions, "≤" indicates that values less than or equal to the threshold predict poor outcome, while ">" indicates that values greater than the threshold predict poor outcome.

**Abbreviations:** AUC, area under the receiver operating characteristic curve; CI, confidence interval; Cys-C, cystatin C; Glu, glucose; Hcy, homocysteine; ICH, intracerebral hemorrhage; NHHR, non-high-density lipoprotein cholesterol to high-density lipoprotein cholesterol ratio; NIHSS, National Institutes of Health Stroke Scale; NPV, negative predictive value; PPV, positive predictive value; RC, remnant cholesterol.

**Supplementary Table S3. Sensitivity analysis comparing multivariable logistic regression models under different variable selection criteria for predicting poor 90-day functional outcome after ICH**

| **Variables** | **Primary Model (A-priori vars + candidates with *P* < 0.1)** | | **Restricted Model (A-priori vars + candidates with *P* < 0.05)** | |
| --- | --- | --- | --- | --- |
| **Model Characteristics** | | | | |
| N | 200 | | 200 | |
| Nagelkerke R² | 0.334 | | 0.281 | |
| AIC | 182.7 | | 231.4 | |
|  | **aOR (95% CI)** | **P-value** | **aOR (95% CI)** | **P-value** |
| **Pre-specified Clinical Covariates (Forced Entry)** | | | | |
| Age | 1.025 (0.992–1.058) | 0.141 | 1.037 (1.008–1.066) | 0.011 |
| Sex | 1.203 (0.534–2.712) | 0.656 | 1.049 (0.526–2.091) | 0.892 |
| NIHSS | 1.153 (1.068–1.244) | ＜0.001 | 1.169 (1.090–1.255) | ＜0.001 |
| Hematoma volume | 0.980 (0.958–1.002) | 0.078 | 0.980 (0.959–1.001) | 0.061 |
| Intraventricular extension | 0.184 (0.055–0.617) | 0.006 | 0.319 (0.118–0.863) | 0.024 |
| **Primary Exposure of Interest** | | | | |
| NHHR | 0.617 (0.408–0.934) | 0.022 | - | - |
| **Other Independent Predictors (Retained after elimination)** | | | | |
| ApoA1 | 0.247 (0.085–0.721) | 0.010 | - | - |

**Notes:** Data are presented as adjusted odds ratios (aOR) with 95% confidence intervals (CIs). Both models were constructed using a pre-specified hybrid strategy: all pre-defined clinical covariates (age, sex, NIHSS score, hematoma volume, and intraventricular extension) were forced into the models regardless of their statistical significance. Exploratory variables were selected based on univariate logistic regression using different P-value thresholds, followed by backward stepwise elimination (removal criterion *P*≥ 0.05). The Primary Model included exploratory variables with univariate *P* < 0.10; after backward elimination, ApoA1 and NHHR were retained. The Restricted Model included only exploratory variables with univariate *P* < 0.05; NHHR did not meet the entry criterion. At the step prior to removal in the Restricted Model, NHHR had an aOR of 0.730 (95% CI: 0.519–1.026, *P* = 0.070). Model fit was assessed using the Akaike Information Criterion (AIC), with lower values indicating better fit. The Primary Model demonstrated superior fit (AIC = 182.7) compared to the Restricted Model (AIC = 231.4).

Abbreviations: AIC, Akaike Information Criterion; aOR, adjusted odds ratio; ApoA1, apolipoprotein A1; CI, confidence interval; GCS, Glasgow Coma Scale; ICH, intracerebral hemorrhage; NHHR, non-high-density lipoprotein cholesterol to high-density lipoprotein cholesterol ratio; NIHSS, National Institutes of Health Stroke Scale; RBC, red blood cell count; RC, remnant cholesterol.

Note: – indicates variable not retained in the final model or did not meet entry criteria.
